# Supplementary material
Source: PubMed Central journal article supplement (PMC4547260)
Supplement: pnas.1506079112.sfig04.pdf [file pnas.1506079112.sfig04.pdf]

$g(r)$  $N(r)$ 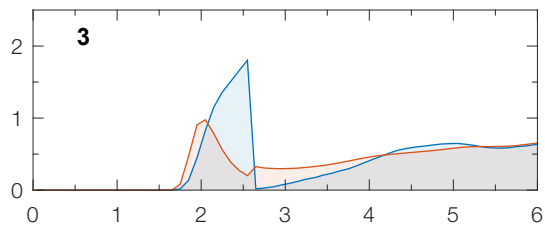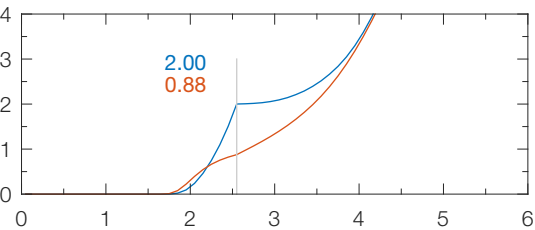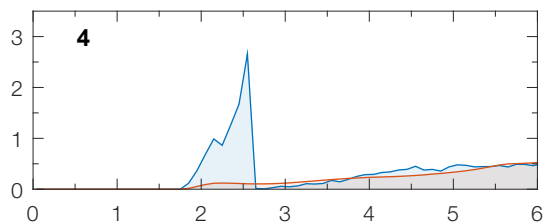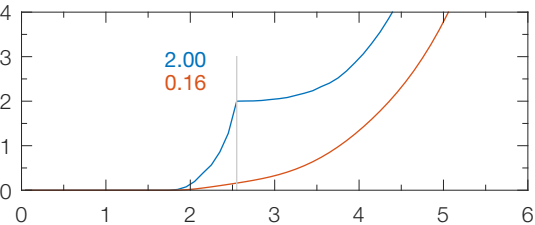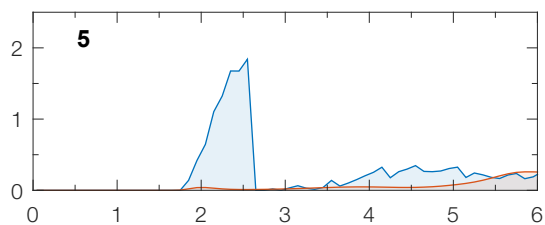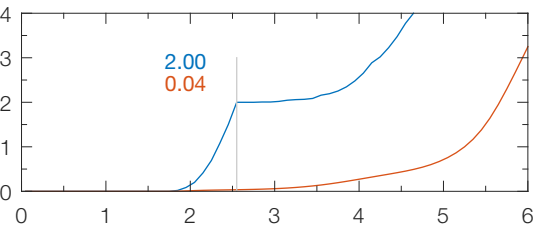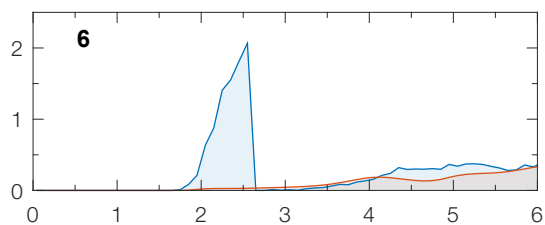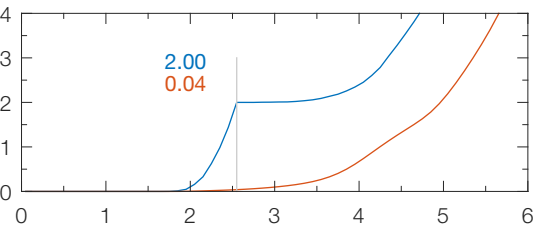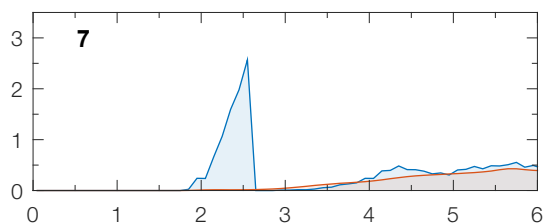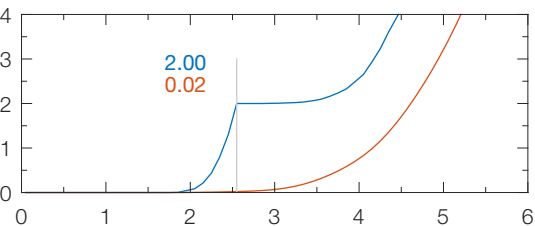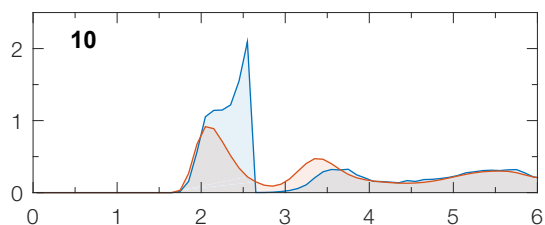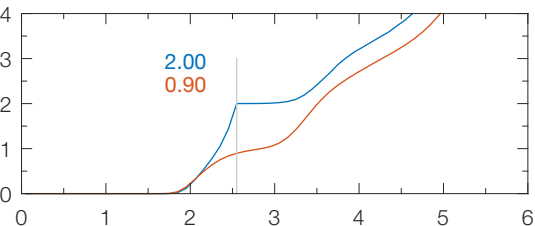 $r(\text{\AA})$

$g(r)$ 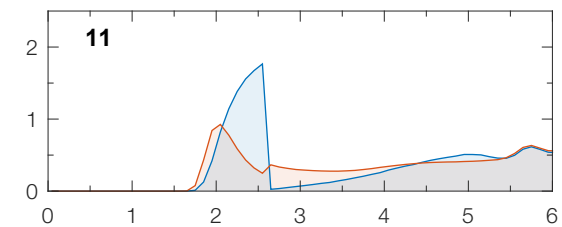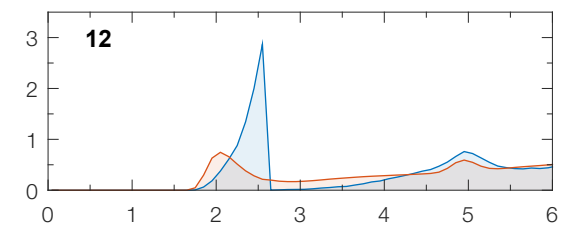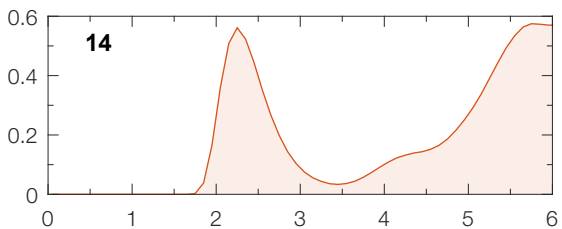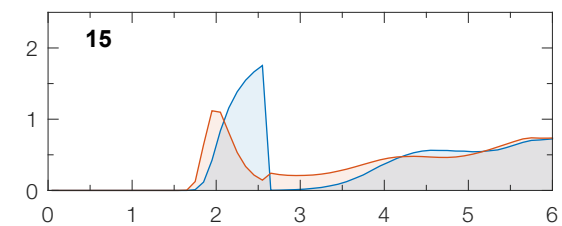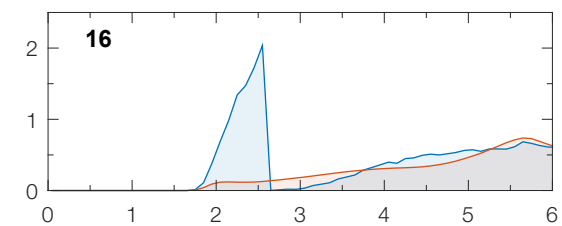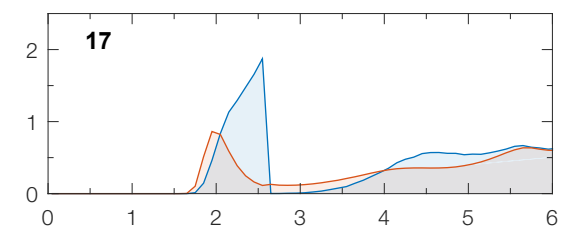 $N(r)$ 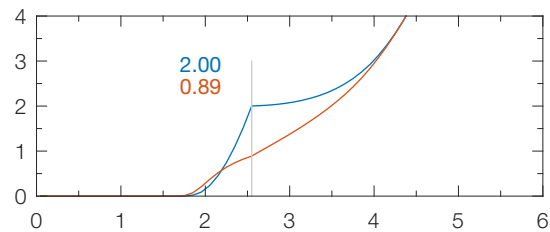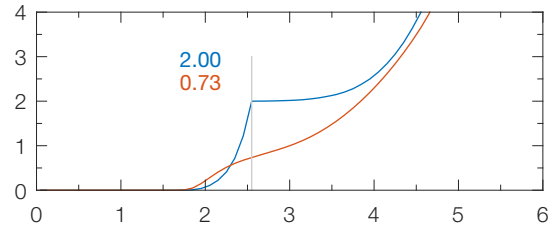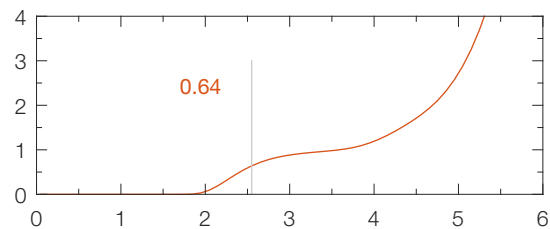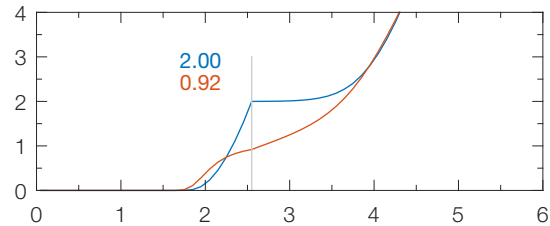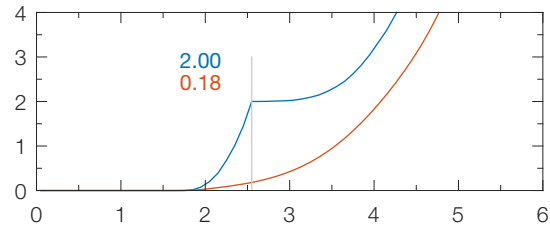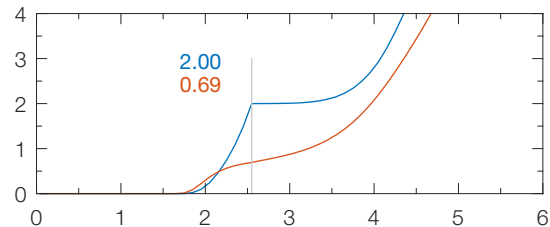 $r (\text{\AA})$

$g(r)$ 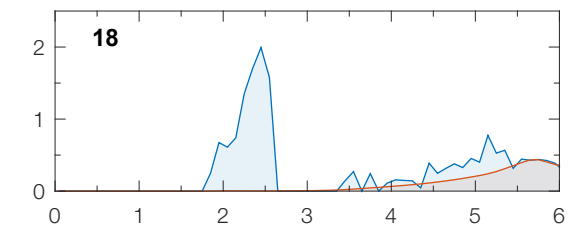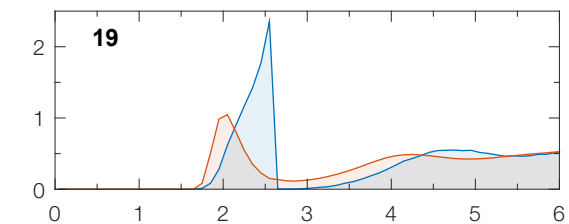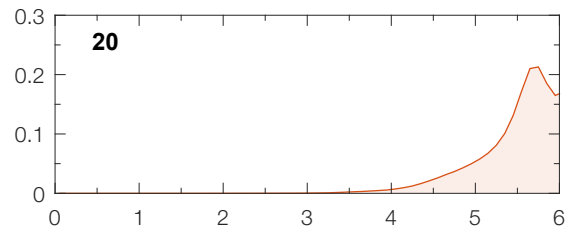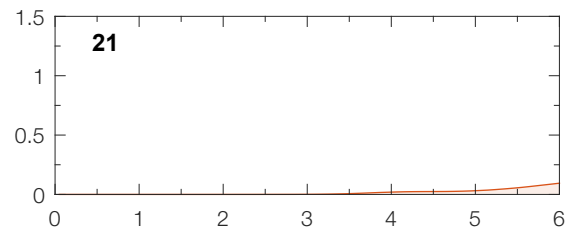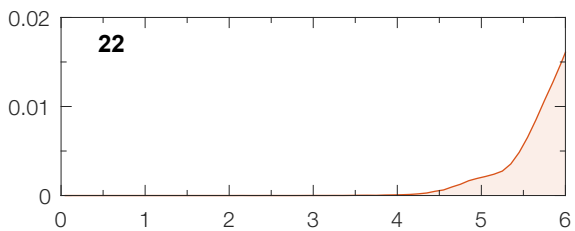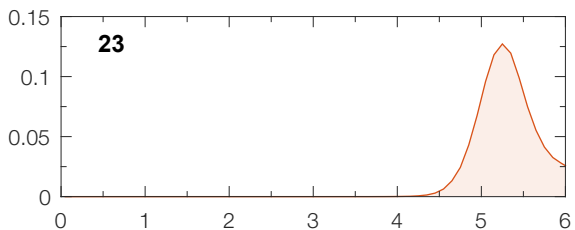 $N(r)$ 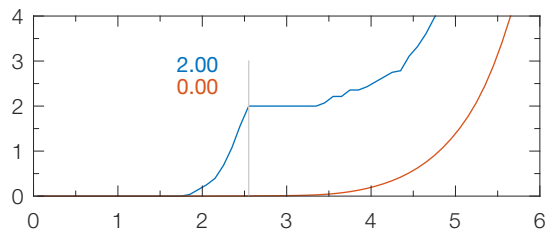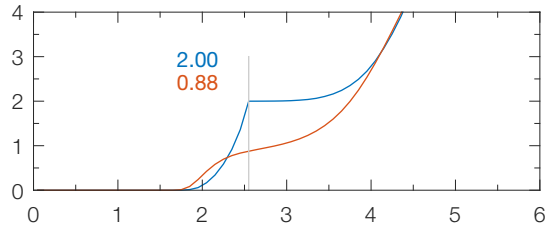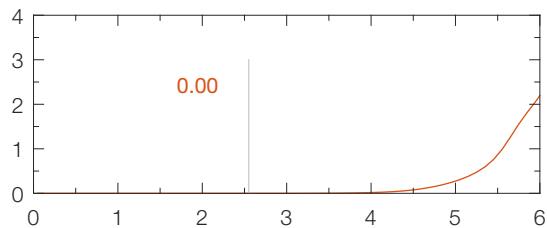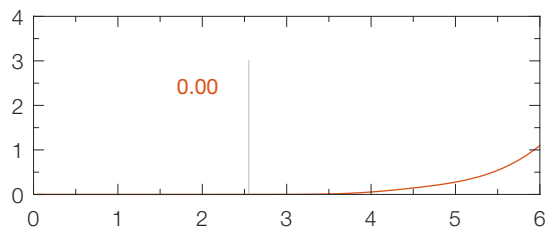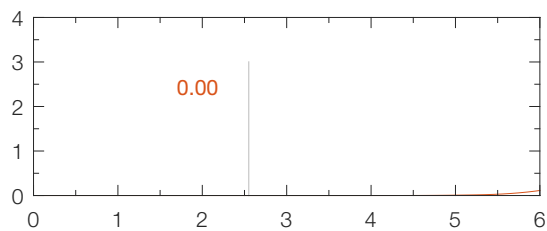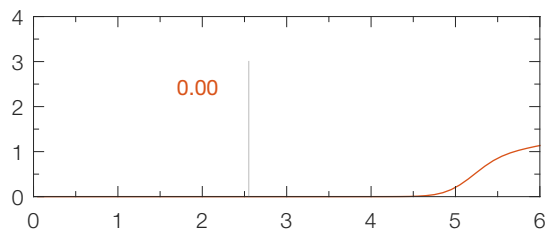 $r(\text{\AA})$

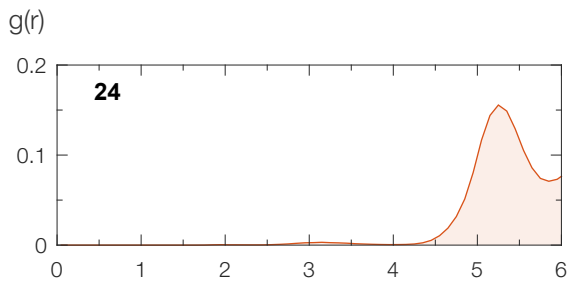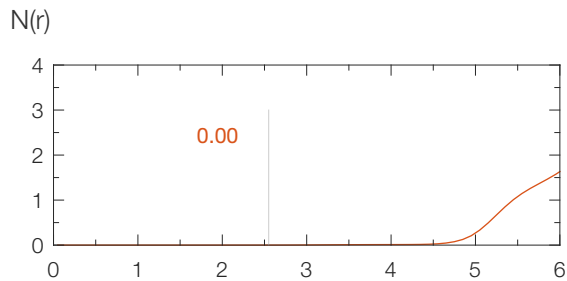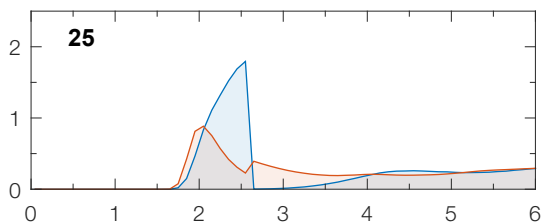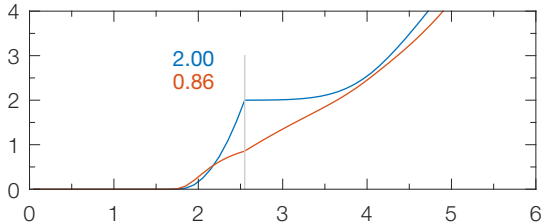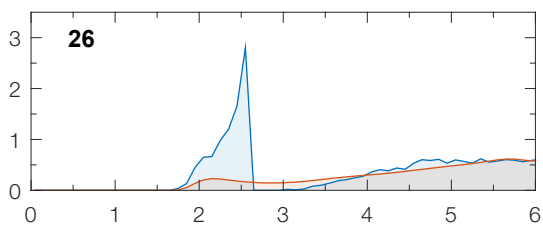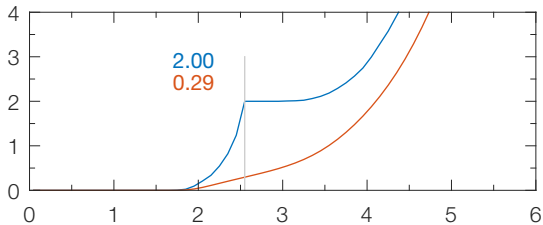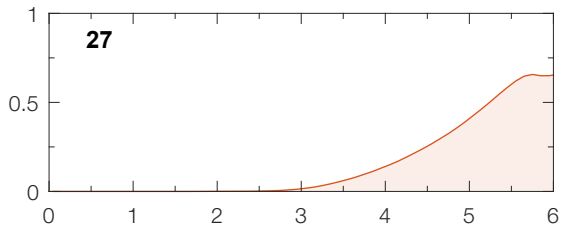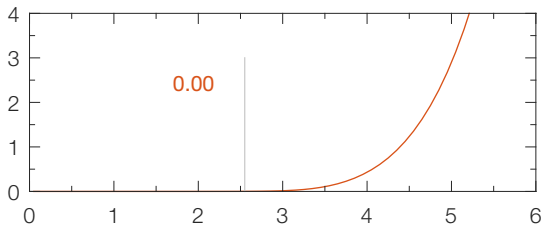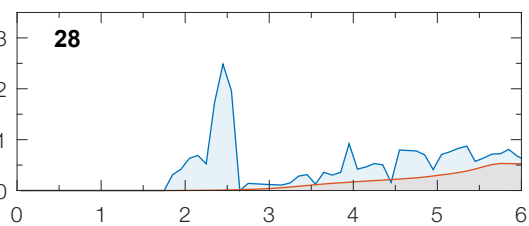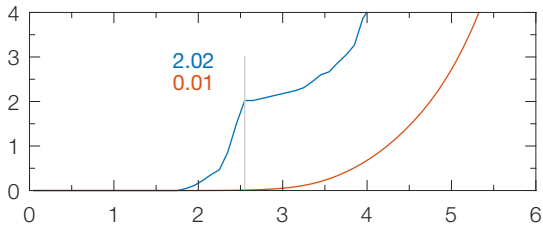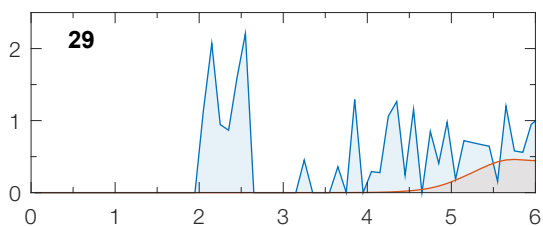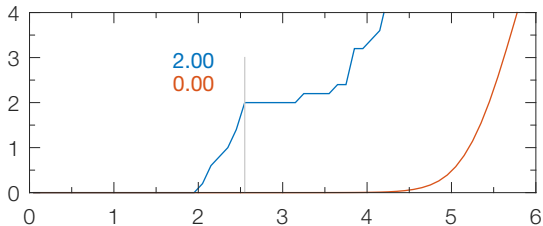

$r(\text{\AA})$

$g(r)$ 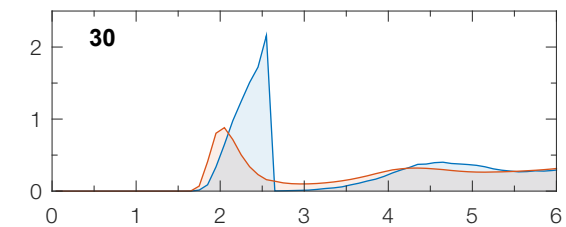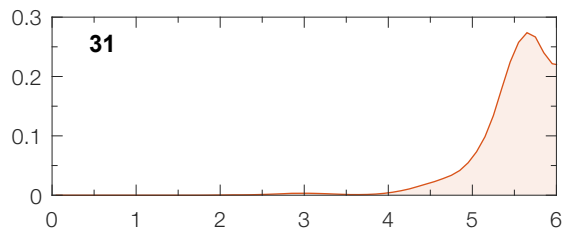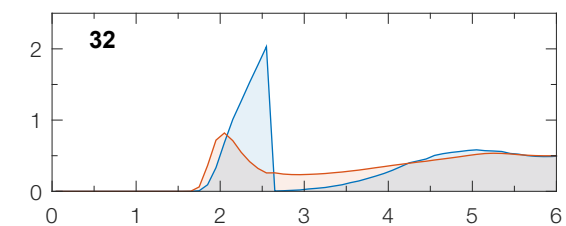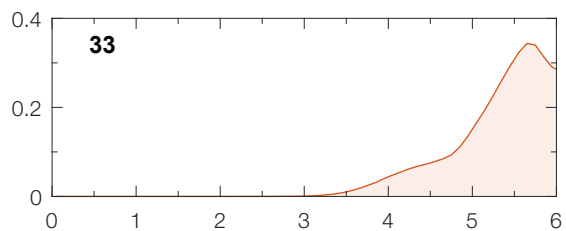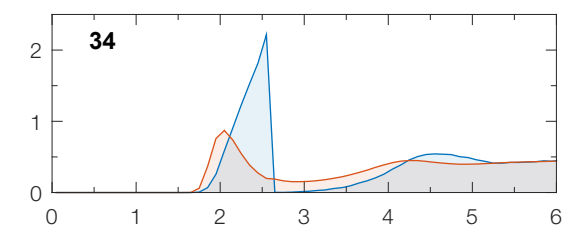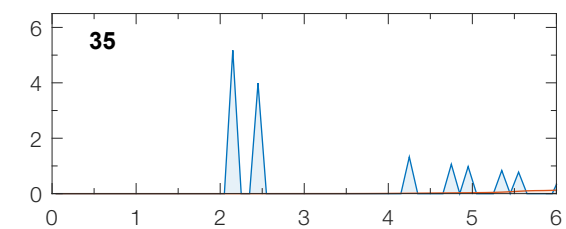 $N(r)$ 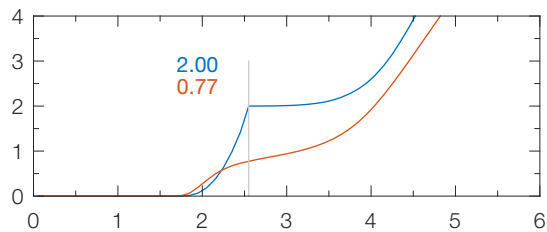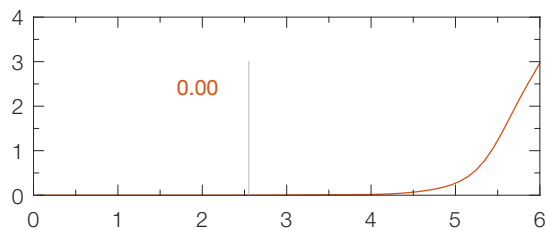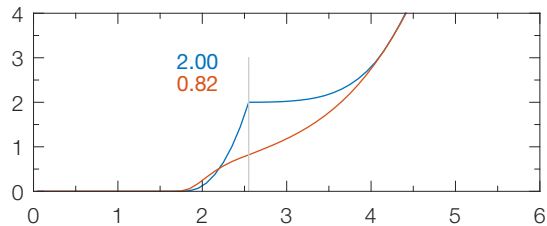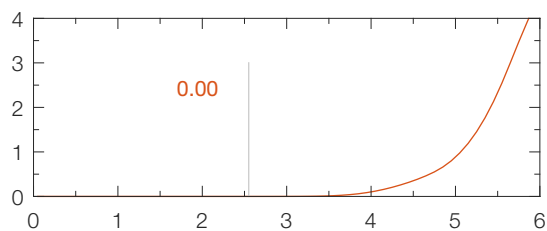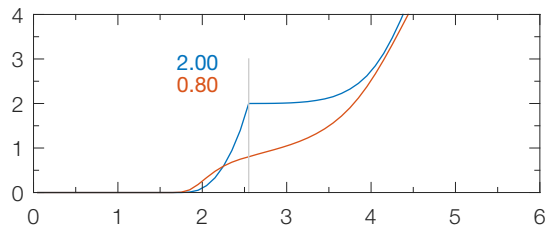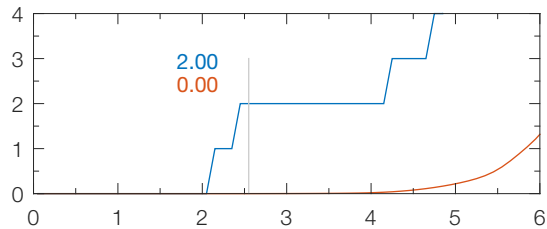 $r(\text{\AA})$

$g(r)$ 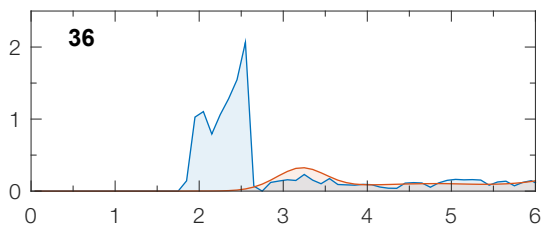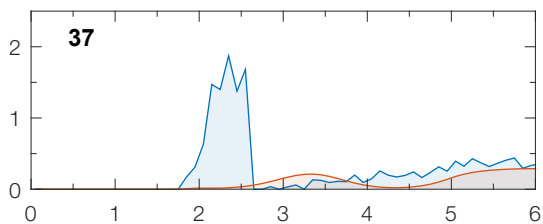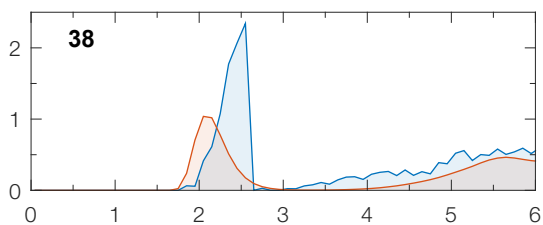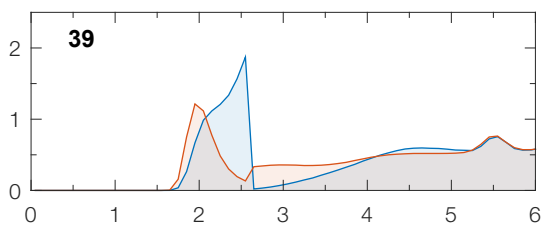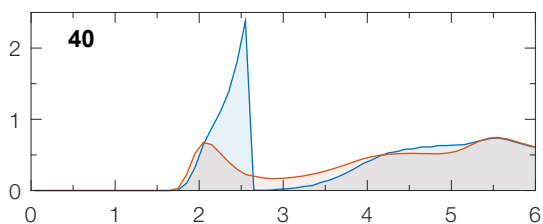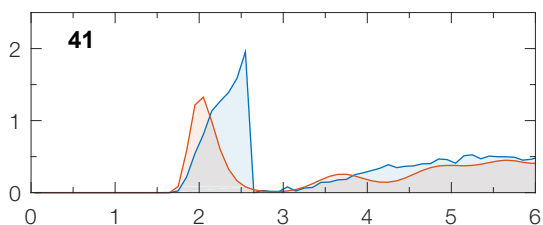 $N(r)$ 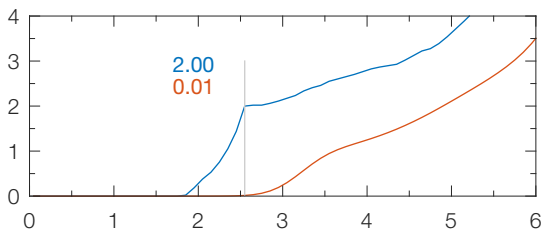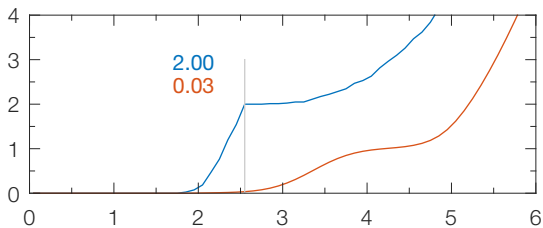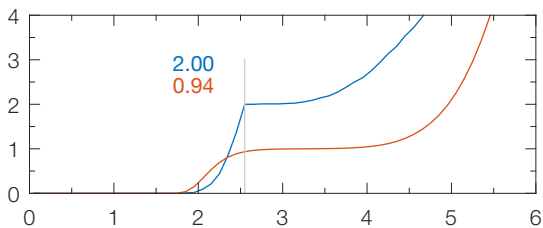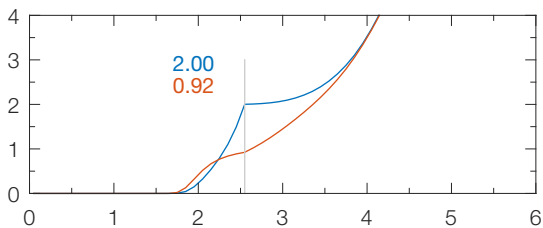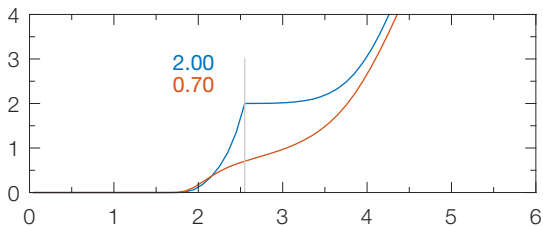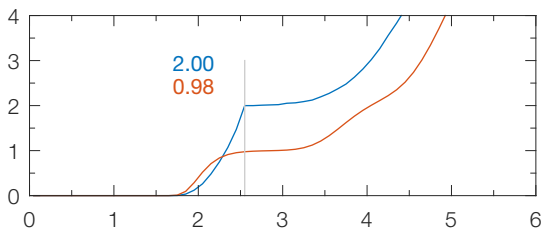 $r(\text{\AA})$

$g(r)$ 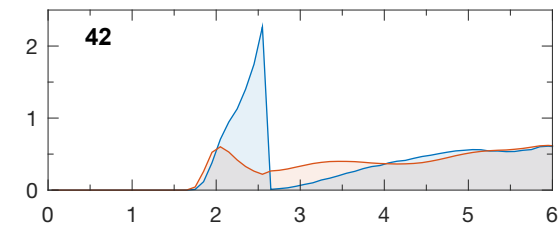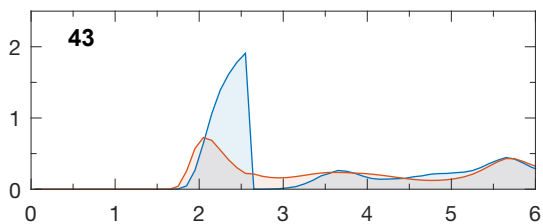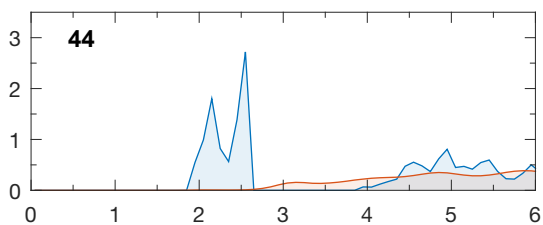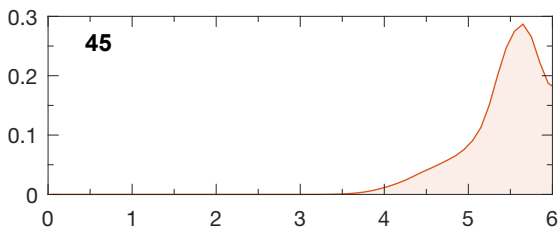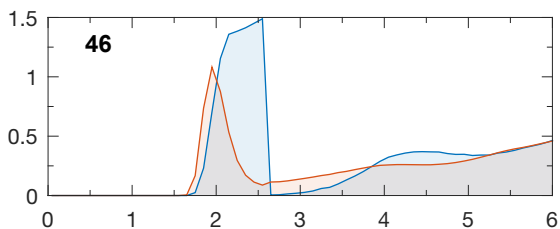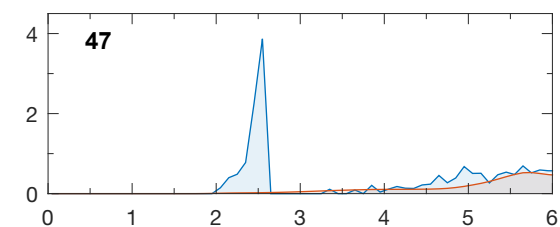 $N(r)$ 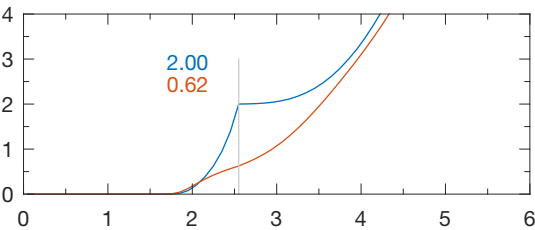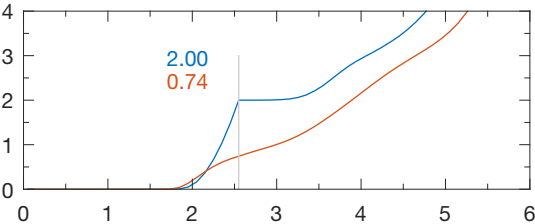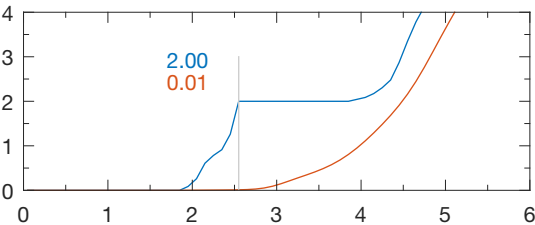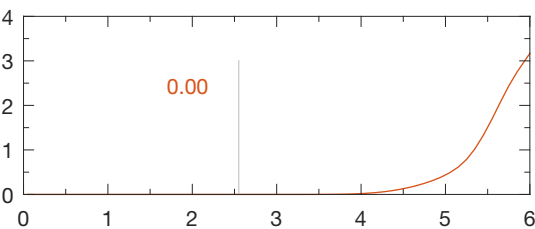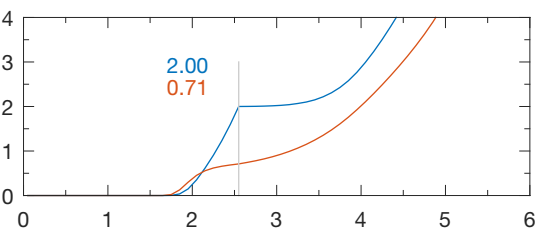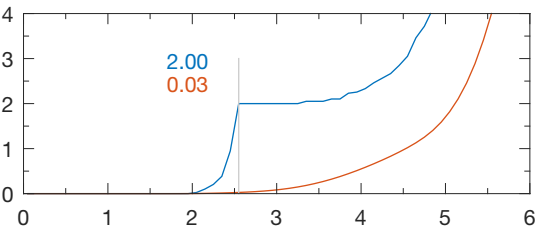 $r(\text{\AA})$

$g(r)$ 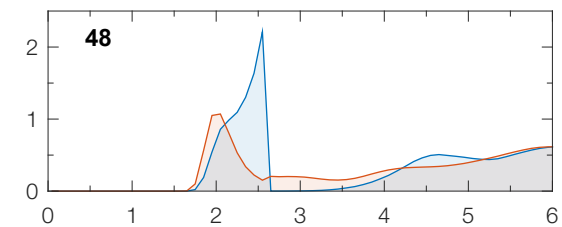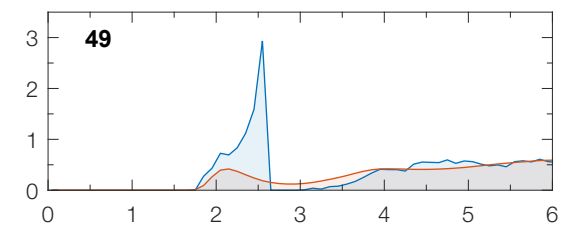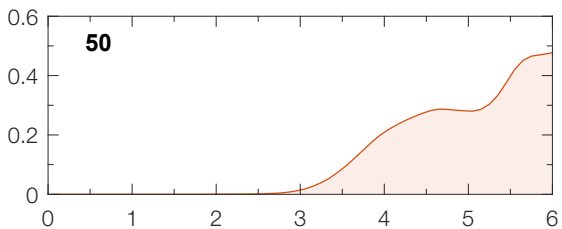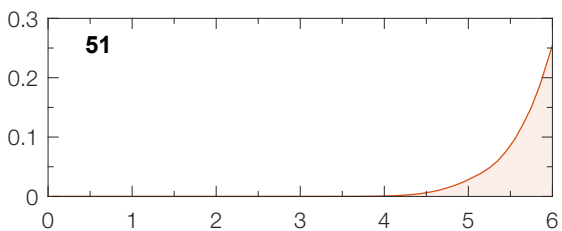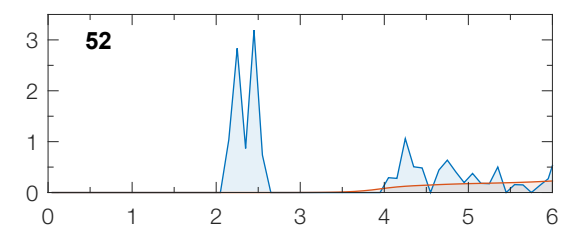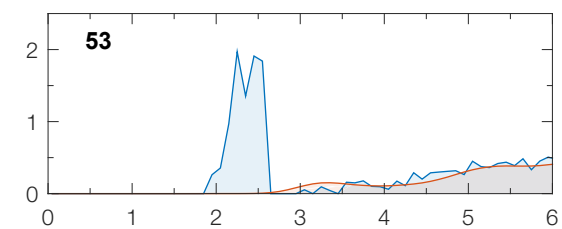 $N(r)$ 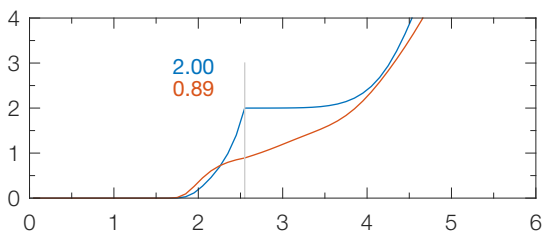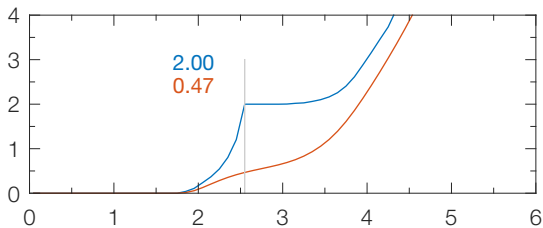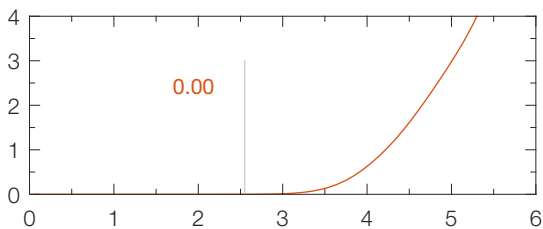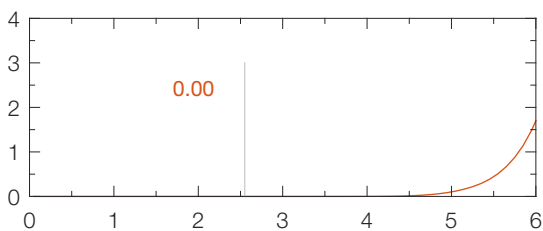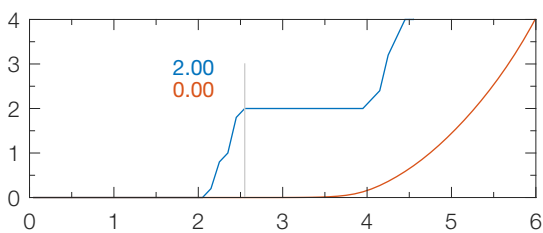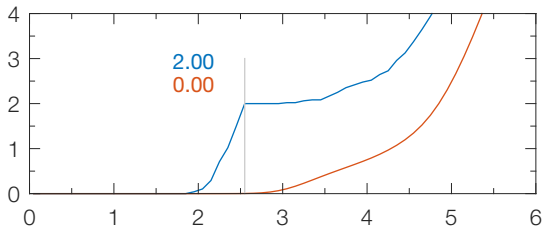 $r(\text{\AA})$



$g(r)$ 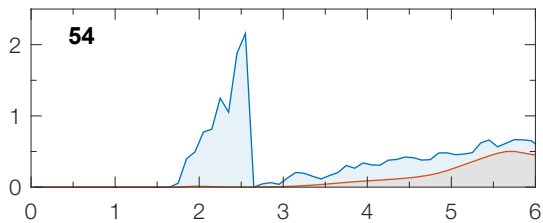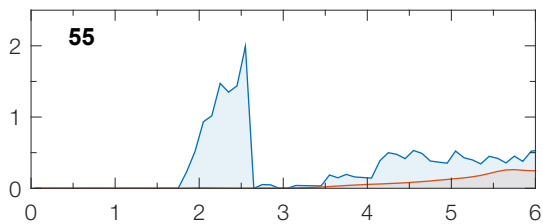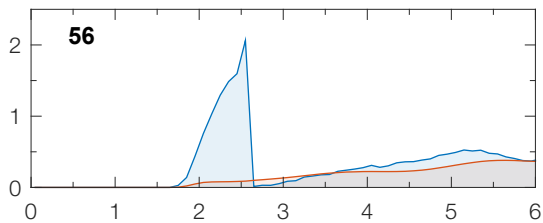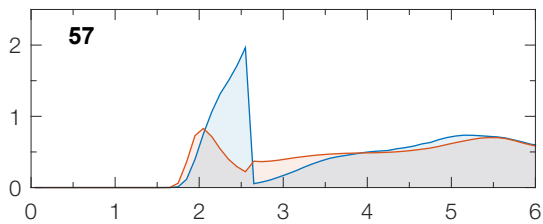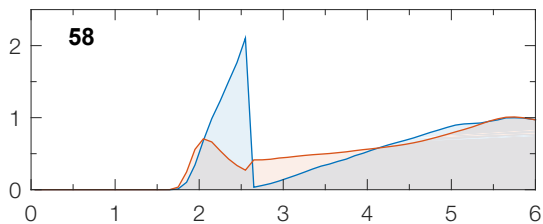 $N(r)$ 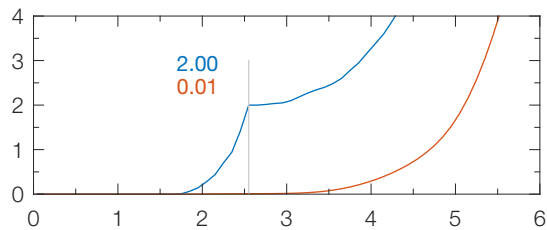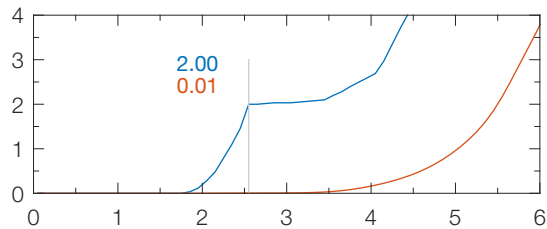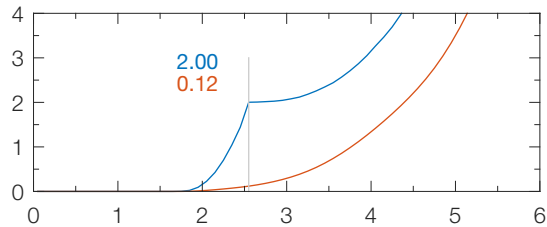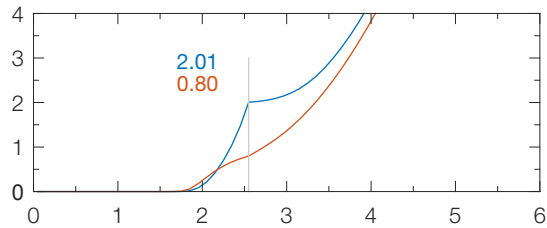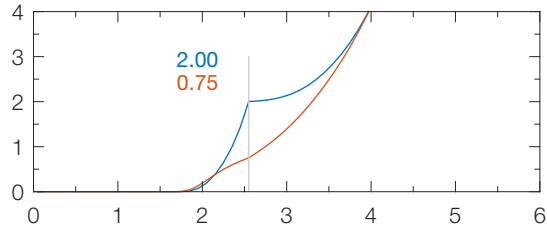 $r (\text{Å})$
