# Supplementary material
Source: PubMed Central journal article supplement (PMC4547260)

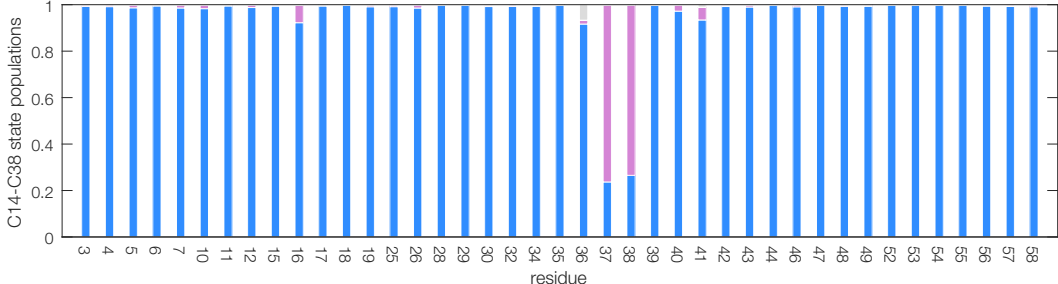

Supplement: pnas.1506079112.sfig01.pdf [file pnas.1506079112.sfig01.pdf]

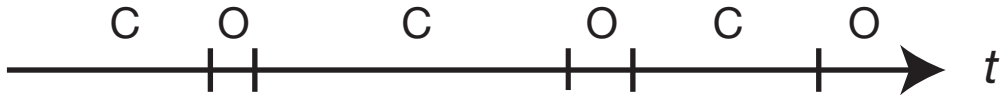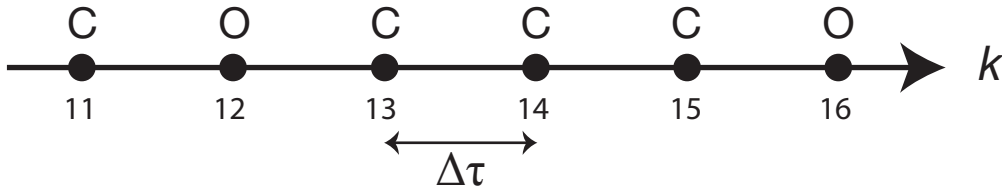

Supplement: pnas.1506079112.sfig02.pdf [file pnas.1506079112.sfig02.pdf]

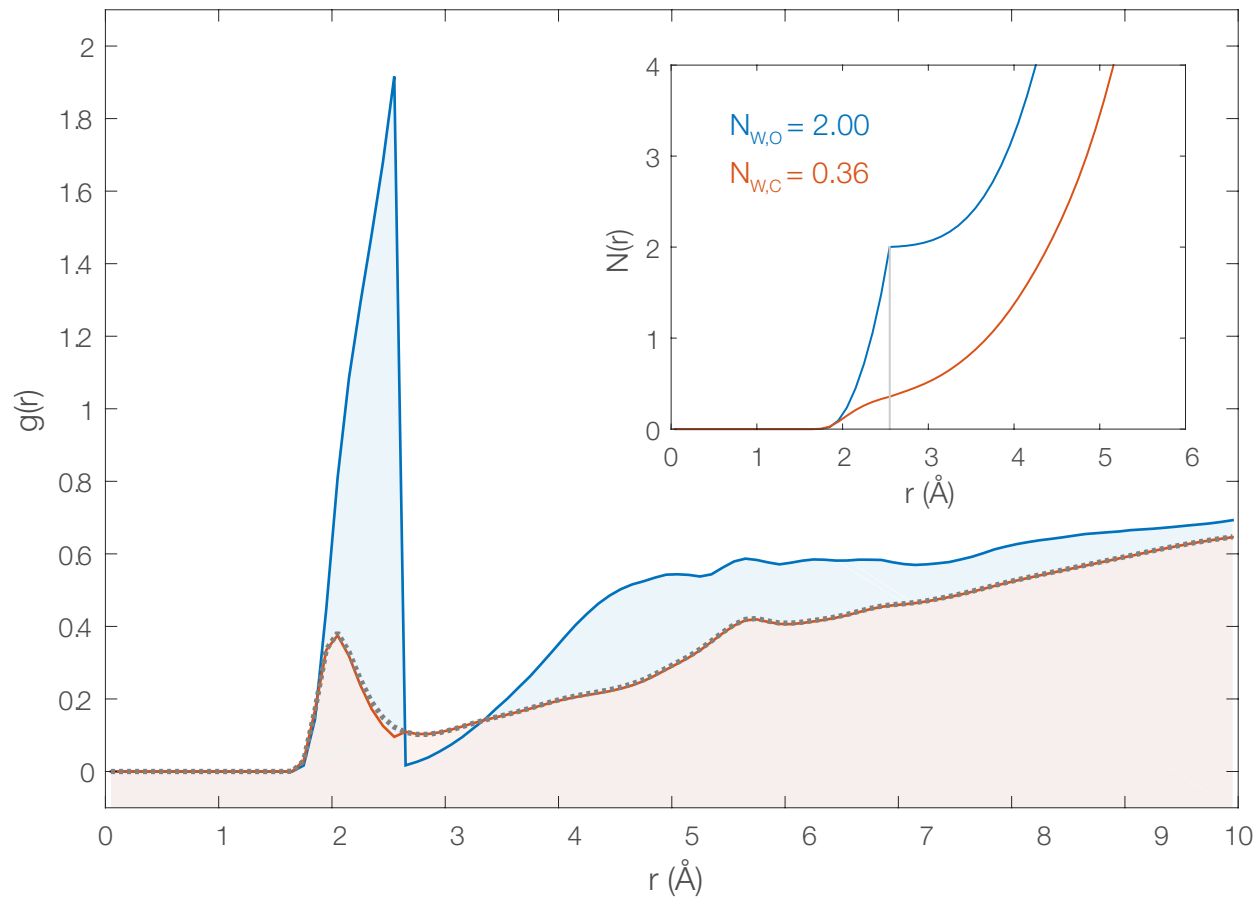

Supplement: pnas.1506079112.sfig03.pdf [file pnas.1506079112.sfig03.pdf]

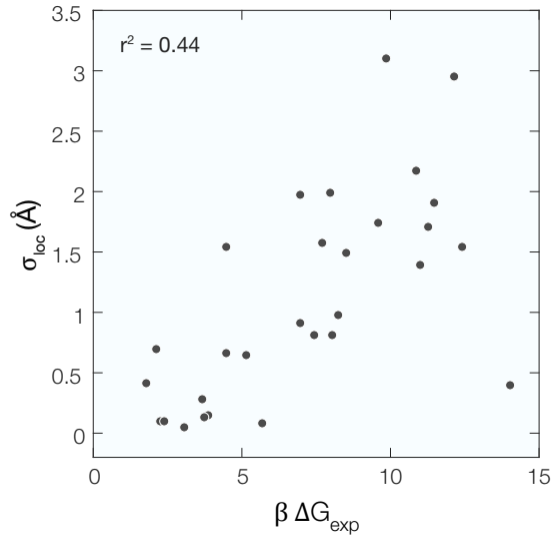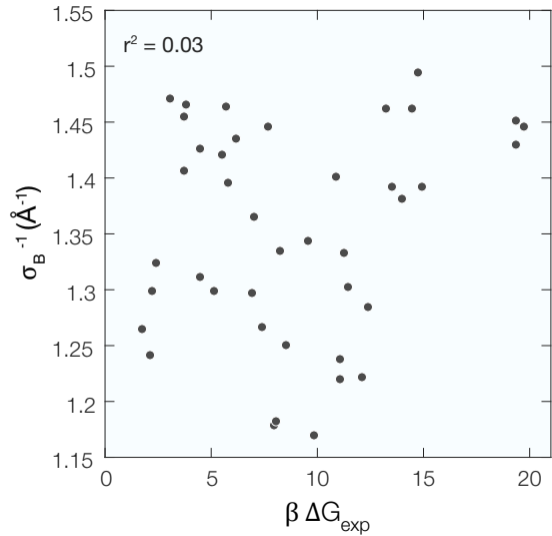

Supplement: pnas.1506079112.sfig05.pdf [file pnas.1506079112.sfig05.pdf]
